# Supplementary material for: A six-metabolite panel as potential blood-based biomarkers for Parkinson’s disease
Source: PubMed Central journal article supplement (PMC8516864; doi:10.1038/s41531-021-00239-x), 2021-10-14
Supplement: 41531_2021_239_MOESM1_ESM.pdf [file 41531_2021_239_MOESM1_ESM.pdf]

## Supplement of:

### A six-metabolite panel as potential blood-based biomarkers for Parkinson's disease.

Stephan Klatt<sup>1,2</sup>, James D. Doecke<sup>2,3</sup>, Anne Roberts<sup>1,2</sup>, Berin A. Boughton<sup>4,5</sup>, Colin L. Masters<sup>1,2</sup>, Malcolm Horne<sup>1</sup>, Blaine R. Roberts<sup>\*6,7</sup>

**Supplementary Table 1.** Mean metabolite concentrations (pmol\* $\mu\text{L}^{-1}$ ) with standard deviations (SD) and results of pairwise comparison prior and after the adjustment for age and sex. Additional data to

Table 1.

| Metabolite             | Mean (SD); in picomoles/ $\mu\text{L}$ |                   |                |                | Unadjusted for confounders p-values |                 |                 | Adjusted for confounders p-values |
|------------------------|----------------------------------------|-------------------|----------------|----------------|-------------------------------------|-----------------|-----------------|-----------------------------------|
|                        | CN (n = 93)                            | naive-iPD (n = 7) | iPD (n = 103)  | AD (n = 28)    | naive-iPD vs iPD                    | naive-iPD vs CN | iPD vs AD       | iPD vs AD                         |
| 2-Ambut                | 22.03 (6.72)                           | 24.34 (9.77)      | 20.7 (5.33)    | 20.49 (8.59)   | 0.37                                | 0.51            | 0.38            | 0.27                              |
| 3-AA                   | 0.04 (0.01)                            | 0.03 (0.01)       | 0.04 (0.02)    | 0.03 (0.01)    | 0.55                                | 0.32            | <b>6.20E-05</b> | 0.002                             |
| 3-HK                   | 0.04 (0.02)                            | 0.05 (0.06)       | 0.05 (0.04)    | 0.03 (0.01)    | 0.22                                | 0.98            | <b>0</b>        | <b>1.05E-03</b>                   |
| 4-OH-Pro               | 11.37 (5.01)                           | 13.97 (6.83)      | 12.16 (4.94)   | 12.41 (5.35)   | 0.48                                | 0.28            | 0.93            | 0.51                              |
| Ala                    | 414.07 (81.01)                         | 438.91 (119.44)   | 432.91 (90.87) | 407.2 (80.2)   | 0.96                                | 0.67            | 0.18            | 0.02                              |
| Arg                    | 81.5 (20.04)                           | 76.93 (24.66)     | 73.81 (15.54)  | 85.11 (19.45)  | 0.97                                | 0.56            | 0.02            | 0.27                              |
| Asn                    | 41.65 (6.23)                           | 42.59 (7.95)      | 42.59 (6.61)   | 38.65 (4.35)   | 0.91                                | 0.81            | <b>4.46E-04</b> | 0.01                              |
| Asp                    | 9.69 (5.32)                            | 10.81 (5.71)      | 12.57 (4.99)   | 9.83 (3.82)    | 0.42                                | 0.96            | 0.02            | 0.002                             |
| $\beta$ -ala           | 4.52 (1.59)                            | 4.69 (1.96)       | 5.19 (1.64)    | 4.41 (1.8)     | 0.41                                | 0.85            | 0.02            | 0.01                              |
| Cad                    | 0.2 (0.09)                             | 0.13 (0.07)       | 0.17 (0.08)    | 0.22 (0.1)     | 0.25                                | 0.04            | 0.002           | 0.01                              |
| Citrulline             | 34.61 (8.12)                           | 32.03 (7.7)       | 33.06 (7.22)   | 37.06 (9.57)   | 0.67                                | 0.41            | 0.10            | 0.81                              |
| Cys                    | 177.14 (28.59)                         | 160.55 (29.36)    | 157.78 (27.56) | 191.13 (22.99) | 0.84                                | 0.23            | <b>0</b>        | <b>9.83E-04</b>                   |
| GABA                   | 0.32 (0.17)                            | 0.34 (0.19)       | 0.31 (0.17)    | 0.35 (0.16)    | 0.56                                | 0.75            | 0.11            | 0.94                              |
| Gln                    | 710.1 (81.81)                          | 729.43 (140.56)   | 690.75 (80.77) | 711.35 (65.59) | 0.58                                | 0.81            | 0.17            | 0.19                              |
| Glu                    | 45.94 (20.46)                          | 52.99 (13.61)     | 54.88 (20.47)  | 38.74 (15.61)  | 0.91                                | 0.12            | <b>7.40E-05</b> | <b>1.76E-04</b>                   |
| Gly                    | 274.57 (67.96)                         | 268.57 (63.31)    | 298.52 (86.63) | 294.61 (61.72) | 0.38                                | 0.84            | 0.49            | 0.69                              |
| His                    | 70.47 (12.75)                          | 75.28 (8.27)      | 70.58 (11.31)  | 69.25 (11.27)  | 0.10                                | 0.10            | 0.60            | 0.87                              |
| Homoserine             | 0.37 (0.14)                            | 0.42 (0.11)       | 0.43 (0.13)    | 0.42 (0.15)    | 0.90                                | 0.12            | 0.50            | 0.32                              |
| Ile                    | 78.89 (14.87)                          | 81.76 (11.6)      | 83.54 (17.3)   | 74.58 (19.6)   | 0.72                                | 0.64            | 0.01            | 0.05                              |
| L-KYN                  | 3.02 (0.78)                            | 2.45 (0.7)        | 2.59 (0.7)     | 2.69 (0.94)    | 0.58                                | 0.09            | 0.83            | 0.64                              |
| Leu                    | 156.23 (28.16)                         | 167.94 (29.47)    | 165.33 (34.58) | 139.5 (25.99)  | 0.31                                | 0.18            | <b>1.76E-04</b> | 0.01                              |
| Lys                    | 229.23 (33.62)                         | 219.13 (10.11)    | 222.4 (36.23)  | 214.97 (35.57) | 0.72                                | 0.15            | 0.26            | 0.05                              |
| Met                    | 29.94 (4.36)                           | 30.21 (3.13)      | 30.62 (5.23)   | 27.73 (4.29)   | 0.75                                | 0.83            | 0.005           | 0.04                              |
| N-acetyl-phenylalanine | 0.03 (0.01)                            | 0.02 (0)          | 0.03 (0.01)    | 0.02 (0.01)    | 0.75                                | 0.71            | <b>2.30E-05</b> | 0.0016                            |
| Orn                    | 63.82 (16.44)                          | 66.93 (26.17)     | 74.95 (16.14)  | 61.41 (12.1)   | 0.32                                | 0.88            | <b>7.30E-05</b> | <b>3.03E-04</b>                   |
| Phe                    | 79.92 (9.29)                           | 80.7 (10.2)       | 83.44 (11.08)  | 75.63 (8.83)   | 0.48                                | 0.85            | <b>1.75E-04</b> | 0.002                             |
| Pro                    | 228.05 (54.83)                         | 274.65 (98.72)    | 246.8 (76.35)  | 259.25 (83.25) | 0.43                                | 0.22            | 0.49            | 0.42                              |
| Put                    | 0.28 (0.15)                            | 0.23 (0.07)       | 0.24 (0.18)    | 0.29 (0.15)    | 0.42                                | 0.44            | 0.02            | 0.06                              |
| Sarco                  | 1.8 (0.63)                             | 2.08 (0.89)       | 1.83 (0.61)    | 1.7 (0.66)     | 0.60                                | 0.59            | 0.23            | 0.52                              |
| Ser                    | 89.3 (17.26)                           | 86.46 (16.05)     | 92.55 (18.43)  | 91.36 (16.96)  | 0.96                                | 0.70            | 0.69            | 0.61                              |
| Serotonin              | 0.39 (0.22)                            | 0.34 (0.21)       | 0.43 (0.32)    | 0.33 (0.24)    | 0.72                                | 0.62            | 0.14            | 0.22                              |
| Tau                    | 111.79 (31.34)                         | 124.97 (35.26)    | 124.91 (32.11) | 121.06 (28.68) | 0.80                                | 0.49            | 0.32            | 0.09                              |
| Thr                    | 125.32 (23.7)                          | 122.05 (20.64)    | 137.59 (31.11) | 122.77 (26.25) | 0.15                                | 0.77            | 0.02            | 0.06                              |
| Trp                    | 75.04 (13.19)                          | 78.18 (10.4)      | 74.46 (12.72)  | 65.49 (12.27)  | 0.19                                | 0.20            | 0.002           | 0.07                              |
| Tryptamine             | 0.02 (0.01)                            | 0.02 (0.01)       | 0.02 (0.01)    | 0.02 (0.01)    | 0.92                                | 0.91            | 0.01            | 0.02                              |
| Tyr                    | 86.02 (14.66)                          | 88.82 (7.86)      | 102.73 (25.51) | 78.74 (15.1)   | 0.01                                | 0.28            | <b>0</b>        | <b>8.40E-05</b>                   |
| Val                    | 276.45 (47.38)                         | 292.45 (31.63)    | 283.03 (53.43) | 248.16 (46.45) | 0.20                                | 0.13            | <b>1.40E-03</b> | 0.02                              |

**Supplementary Table 2. Age and gender effects of tested cohort.** Possible effects were tested via Pearson's correlation and Independent Samples t-test. Interactions between disease state (CN vs iPD participants) and age/gender were tested for each metabolite/amino acid via Generalized Linear Modelling (GLM) to determine whether either confounder had a significant effect on metabolite via disease state.

| Metabolite             | Mean (SD)    | Mean (SD)    | T-test  | Pearson's R correlation coefficient with age | p-value | Interaction CN/iPD*Age | Interaction CN/iPD*Sex |
|------------------------|--------------|--------------|---------|----------------------------------------------|---------|------------------------|------------------------|
|                        | Males        | Females      | p-value |                                              |         | p-value                | p-value                |
| Ala                    | 6.03 (0.21)  | 6.02 (0.19)  | 0.683   | 0.029                                        | 0.664   | 0.181                  | 0.266                  |
| 2-Ambut                | 3.02 (0.28)  | 3 (0.3)      | 0.600   | -0.044                                       | 0.507   | 0.005                  | 0.444                  |
| Arg                    | 4.32 (0.23)  | 4.36 (0.22)  | 0.225   | 0.253                                        | <0.001  | 0.675                  | 0.417                  |
| Asn                    | 3.75 (0.13)  | 3.68 (0.14)  | <0.001  | -0.094                                       | 0.155   | 0.463                  | 0.022                  |
| Asp                    | 2.22 (0.57)  | 2.36 (0.46)  | 0.034   | -0.120                                       | 0.069   | 0.449                  | 0.715                  |
| β-ala                  | 1.59 (0.3)   | 1.4 (0.36)   | <0.001  | 0.043                                        | 0.518   | 0.095                  | 0.006                  |
| Cad                    | -1.78 (0.45) | -1.78 (0.51) | 0.977   | 0.221                                        | <0.001  | 0.272                  | 0.576                  |
| Citrulline             | 3.5 (0.22)   | 3.52 (0.23)  | 0.473   | 0.319                                        | <0.001  | 0.799                  | 0.969                  |
| Cys                    | 5.1 (0.19)   | 5.14 (0.18)  | 0.145   | 0.500                                        | <0.001  | 0.158                  | 0.915                  |
| GABA                   | -1.31 (0.57) | -1.23 (0.57) | 0.329   | 0.186                                        | 0.005   | 0.619                  | 0.754                  |
| Gln                    | 6.56 (0.11)  | 6.53 (0.11)  | 0.018   | 0.084                                        | 0.202   | 0.483                  | 0.076                  |
| Glu                    | 3.85 (0.42)  | 3.77 (0.41)  | 0.178   | -0.120                                       | 0.070   | 0.045                  | 0.960                  |
| Gly                    | 5.59 (0.2)   | 5.68 (0.29)  | 0.010   | 0.049                                        | 0.460   | 0.659                  | 0.255                  |
| His                    | 4.27 (0.15)  | 4.21 (0.18)  | 0.009   | -0.095                                       | 0.151   | 0.477                  | 0.012                  |
| Homoserine             | -0.96 (0.37) | -1.01 (0.4)  | 0.414   | -0.037                                       | 0.578   | 0.291                  | 0.684                  |
| 3-AA                   | -3.27 (0.43) | -3.49 (0.44) | <0.001  | -0.130                                       | 0.048   | 0.438                  | 0.396                  |
| 4-OH-Pro               | 2.47 (0.39)  | 2.3 (0.39)   | <0.001  | 0.072                                        | 0.276   | 0.037                  | 0.203                  |
| 3-HK                   | -3.36 (0.54) | -3.46 (0.57) | 0.184   | -0.116                                       | 0.080   | 0.078                  | 0.659                  |
| Ile                    | 4.43 (0.2)   | 4.29 (0.19)  | <0.001  | -0.115                                       | 0.080   | 0.964                  | 0.239                  |
| Kyn                    | 1 (0.27)     | 0.97 (0.28)  | 0.426   | 0.306                                        | <0.001  | 0.060                  | 0.124                  |
| Leu                    | 5.11 (0.19)  | 4.97 (0.17)  | <0.001  | -0.256                                       | <0.001  | 0.335                  | 0.082                  |
| Lys                    | 5.4 (0.15)   | 5.4 (0.16)   | 0.841   | 0.053                                        | 0.419   | 0.197                  | 0.018                  |
| Met                    | 3.43 (0.15)  | 3.33 (0.15)  | <0.001  | -0.133                                       | 0.043   | 0.639                  | 0.023                  |
| N-Acetyl-phenylalanine | -3.65 (0.45) | -3.83 (0.45) | 0.003   | -0.101                                       | 0.126   | 0.562                  | 0.700                  |
| Orn                    | 4.22 (0.25)  | 4.17 (0.26)  | 0.208   | -0.039                                       | 0.554   | 0.354                  | 0.069                  |
| Phe                    | 4.41 (0.12)  | 4.36 (0.13)  | 0.002   | -0.201                                       | 0.002   | 0.873                  | 0.072                  |
| Pro                    | 5.5 (0.27)   | 5.38 (0.25)  | <0.001  | -0.023                                       | 0.732   | 0.062                  | 0.290                  |
| Put                    | -1.49 (0.61) | -1.5 (0.71)  | 0.952   | 0.097                                        | 0.143   | 0.541                  | 0.172                  |
| Sarco                  | 0.6 (0.3)    | 0.44 (0.33)  | <0.001  | -0.131                                       | 0.047   | 0.150                  | 0.947                  |
| Ser                    | 4.5 (0.19)   | 4.49 (0.22)  | 0.860   | -0.004                                       | 0.952   | 0.406                  | 0.244                  |
| Serotonin              | -1.13 (0.82) | -1.35 (1.12) | 0.108   | 0.012                                        | 0.852   | 0.525                  | 0.747                  |
| Tau                    | 4.72 (0.28)  | 4.81 (0.23)  | 0.006   | -0.110                                       | 0.097   | 0.418                  | 0.951                  |
| Thr                    | 4.88 (0.2)   | 4.81 (0.23)  | 0.025   | -0.082                                       | 0.217   | 0.379                  | 0.160                  |
| Trp                    | 4.33 (0.17)  | 4.22 (0.19)  | <0.001  | -0.164                                       | 0.013   | 0.776                  | 0.296                  |
| Typtamine              | -3.86 (0.45) | -4.06 (0.49) | 0.002   | -0.044                                       | 0.508   | 0.535                  | 0.315                  |
| Tyr                    | 4.53 (0.22)  | 4.47 (0.22)  | 0.037   | -0.112                                       | 0.088   | 0.030                  | 0.231                  |
| Val                    | 5.65 (0.18)  | 5.56 (0.18)  | <0.001  | -0.197                                       | 0.003   | 0.163                  | 0.757                  |

**Supplementary Table 3. Mean ratios/interaction levels between CN and iPD groups.** To assess the interrelationships between metabolites, all possible metabolite ratios and interactions were calculated for assessment between the CN and treated iPD groups.

| Metabolite                  | N  |     | Mean (SD)         |                   |                   |                   | unadjusted for confounders p-values |           | Adjusted for confounders p-values |       |          |          |          |          |
|-----------------------------|----|-----|-------------------|-------------------|-------------------|-------------------|-------------------------------------|-----------|-----------------------------------|-------|----------|----------|----------|----------|
|                             | CN | iPD | naive-iPD         | iPD               | AD                | naive-iPD vs iPD  | naive-iPD vs CN                     | iPD vs CN | iPD vs AD                         |       |          |          |          |          |
| Homoserine*Orn              | 93 | 7   | 23.77 (11.96)     | 28.84 (15.45)     | 31.98 (11.89)     | 26.15 (11.49)     | 0.515                               | 0.310     | 1.00E-06                          | 0.262 | 3.17E-02 | 0.239    | 1.74E-02 |          |
|                             | 93 | 7   | 297.95 (156.41)   | 336.65 (251.12)   | 398.66 (181.81)   | 259.8 (103.45)    | 0.324                               | 0.845     | 7.00E-06                          | 0.336 | 4.50E-05 | 0.783    | 8.30E-05 |          |
|                             | 93 | 7   | 845.07 (479.13)   | 974.6 (531.85)    | 1278.56 (593.25)  | 772.85 (346.92)   | 0.295                               | 0.770     | 1.00E-06                          | 0.947 | 2.50E-05 | 1.90E-05 | 0.855    | 5.30E-05 |
| Asp*Thr                     | 93 | 7   | 4001.77 (2008.08) | 4756.41 (1511.22) | 5695.77 (2774.62) | 3036.21 (1297.06) | 0.430                               | 0.109     | 1.00E-06                          | 0.013 | 0.00E+00 | 2.10E-05 | 0.338    | 6.00E-06 |
|                             | 93 | 7   | 646.85 (407.25)   | 780.03 (542.86)   | 951.5 (464.85)    | 611.64 (277.79)   | 0.349                               | 0.852     | 2.00E-06                          | 0.626 | 5.10E-04 | 4.10E-05 | 0.799    | 1.80E-04 |
|                             | 93 | 7   | 3.42 (1.97)       | 4.82 (3.49)       | 5.03 (2.33)       | 4.12 (2.28)       | 0.558                               | 0.434     | 0.00E+00                          | 0.091 | 4.59E-02 | 4.30E-05 | 0.151    | 2.22E-02 |
| Asp/L-KYN                   | 93 | 7   | 3036.22 (1674.92) | 3564.5 (1613.55)  | 4207.2 (2027.61)  | 2423.13 (1117.07) | 0.463                               | 0.277     | 3.00E-06                          | 0.123 | 6.00E-06 | 4.90E-05 | 0.194    | 2.70E-05 |
|                             | 93 | 7   | 3.72 (2.8)        | 4.27 (2.24)       | 5.28 (2.56)       | 4.36 (2.89)       | 0.412                               | 0.399     | 7.00E-06                          | 0.137 | 8.83E-02 | 8.70E-05 | 0.239    | 1.10E-02 |
|                             | 93 | 7   | 17.14 (11.2)      | 21.68 (5.6)       | 23.5 (12.31)      | 16.13 (8.18)      | 0.923                               | 0.010     | 8.00E-06                          | 0.973 | 2.37E-03 | 1.03E-04 | 0.971    | 1.08E-03 |
| Homoserine*Asp              | 93 | 7   | 45.39 (30.63)     | 57.03 (43.98)     | 66.15 (37.25)     | 40.47 (19.1)      | 0.406                               | 0.848     | 1.20E-05                          | 0.877 | 3.12E-04 | 1.15E-04 | 0.793    | 1.45E-04 |
|                             | 93 | 7   | 1.72 (1.09)       | 1.99 (1.01)       | 2.24 (1.09)       | 1.78 (0.85)       | 0.592                               | 0.296     | 7.00E-05                          | 0.520 | 4.29E-02 | 1.56E-04 | 0.300    | 9.20E-03 |
|                             | 93 | 7   | 217.91 (145.68)   | 253.6 (126.92)    | 292.63 (173.49)   | 159.33 (73.78)    | 0.590                               | 0.324     | 4.50E-05                          | 0.062 | 2.00E-06 | 1.67E-04 | 0.234    | 3.40E-05 |
| Gln*β-ala                   | 93 | 7   | 12.39 (15.1)      | 10.22 (7.07)      | 7.19 (4.72)       | 10.28 (5.39)      | 0.321                               | 0.657     | 2.00E-06                          | 0.734 | 1.27E-03 | 1.82E-04 | 0.884    | 9.75E-04 |
|                             | 93 | 7   | 0.06 (0.03)       | 0.07 (0.03)       | 0.08 (0.04)       | 0.05 (0.02)       | 0.361                               | 0.589     | 1.00E-06                          | 0.979 | 3.40E-05 | 2.59E-04 | 0.930    | 1.39E-04 |
|                             | 93 | 7   | 0.48 (0.28)       | 0.48 (0.3)        | 0.64 (0.32)       | 0.56 (0.29)       | 0.228                               | 0.907     | 6.30E-05                          | 0.070 | 2.32E-01 | 3.16E-04 | 0.182    | 1.16E-01 |
| Asp/Z-Ambut                 | 93 | 7   | 503 (480.26)      | 619.4 (398.59)    | 723.85 (477.04)   | 405.28 (280.77)   | 0.535                               | 0.525     | 3.10E-05                          | 0.684 | 3.46E-04 | 3.74E-04 | 0.611    | 1.21E-04 |
|                             | 93 | 7   | 0.04 (0.02)       | 0.05 (0.03)       | 0.06 (0.02)       | 0.05 (0.02)       | 0.447                               | 0.780     | 3.40E-05                          | 0.134 | 4.70E-02 | 5.19E-04 | 0.361    | 2.27E-02 |
|                             | 93 | 7   | 1258.72 (763.75)  | 1328.03 (714.45)  | 1725.4 (802.02)   | 1214.27 (599.01)  | 0.305                               | 0.922     | 3.80E-05                          | 0.605 | 2.78E-03 | 5.49E-04 | 0.714    | 1.46E-03 |
| Asp*Thr                     | 93 | 7   | 2.28 (1.29)       | 1.92 (1.18)       | 3.46 (2.14)       | 1.58 (0.69)       | 0.066                               | 0.480     | 3.90E-05                          | 0.005 | 0.00E+00 | 6.31E-04 | 0.017    | 4.29E-04 |
|                             | 93 | 7   | 111.76 (150.06)   | 103.34 (90.43)    | 70.03 (51.09)     | 85.93 (43.33)     | 0.442                               | 0.787     | 8.50E-05                          | 0.449 | 1.21E-02 | 7.27E-04 | 0.781    | 1.83E-03 |
|                             | 93 | 7   | 5818.59 (2990.61) | 6358.46 (1537.65) | 7709.95 (3964.18) | 4873.56 (2521.66) | 0.351                               | 0.138     | 4.50E-05                          | 0.113 | 7.70E-05 | 7.56E-04 | 0.176    | 2.68E-04 |
| Orn*hydroxyanthranilic.acid | 93 | 7   | 2.27 (0.99)       | 2.18 (0.99)       | 3.16 (1.59)       | 1.71 (0.73)       | 0.087                               | 0.968     | 8.70E-05                          | 0.010 | 1.00E-06 | 8.94E-04 | 0.061    | 1.33E-04 |
|                             | 93 | 7   | 0.37 (0.37)       | 0.32 (0.21)       | 0.57 (0.37)       | 0.24 (0.12)       | 0.155                               | 0.712     | 3.00E-05                          | 0.156 | 1.00E-06 | 9.15E-04 | 0.174    | 3.70E-04 |
|                             | 93 | 7   | 3.12 (1.81)       | 2.46 (1.15)       | 4.71 (3.07)       | 2.03 (0.89)       | 0.028                               | 0.404     | 5.50E-05                          | 0.001 | 0.00E+00 | 1.03E-03 | 0.005    | 2.08E-04 |
| Tyr*Pro                     | 93 | 7   | 2244.92 (1282.91) | 2912.11 (2002.8)  | 3027.73 (1527.01) | 2406.65 (1020.46) | 0.643                               | 0.491     | 6.50E-05                          | 0.141 | 5.33E-02 | 1.03E-03 | 0.225    | 9.96E-03 |
|                             | 93 | 7   | 2.27 (1.24)       | 1.92 (0.43)       | 2.93 (1.29)       | 1.55 (0.61)       | 0.005                               | 0.646     | 6.90E-05                          | 0.002 | 0.00E+00 | 1.08E-03 | 0.021    | 1.20E-05 |
|                             | 93 | 7   | 68.22 (188.83)    | 56.24 (39.63)     | 100.4 (148.22)    | 43.58 (30.65)     | 0.339                               | 0.738     | 6.90E-05                          | 0.931 | 1.43E-03 | 1.29E-03 | 0.953    | 3.25E-03 |
| Asp*Put                     | 93 | 7   | 0.35 (0.24)       | 0.38 (0.29)       | 0.52 (0.34)       | 0.25 (0.12)       | 0.258                               | 0.942     | 4.90E-05                          | 0.197 | 2.00E-06 | 1.29E-03 | 0.358    | 1.10E-04 |
|                             | 93 | 7   | 1.82 (1.94)       | 1.48 (0.74)       | 2.41 (1.41)       | 1.04 (0.7)        | 0.113                               | 0.966     | 8.60E-05                          | 0.005 | 0.00E+00 | 1.45E-03 | 0.010    | 4.30E-05 |
|                             | 93 | 7   | 423.33 (376.29)   | 588.37 (285.68)   | 549.44 (297.14)   | 319.84 (107.77)   | 0.584                               | 0.052     | 3.90E-05                          | 0.113 | 1.00E-06 | 1.63E-03 | 0.297    | 3.41E-04 |
| Asp*N-Acetyl-phenylalanine  | 93 | 7   | 0.26 (0.21)       | 0.24 (0.15)       | 0.37 (0.21)       | 0.2 (0.12)        | 0.175                               | 0.911     | 5.30E-05                          | 0.325 | 8.20E-05 | 1.76E-03 | 0.394    | 1.61E-04 |
|                             | 93 | 7   | 104.79 (62.17)    | 98.49 (35.21)     | 76.58 (47.88)     | 115.67 (44.81)    | 0.034                               | 0.978     | 4.00E-06                          | 0.135 | 3.00E-06 | 1.78E-03 | 0.157    | 6.85E-03 |
|                             | 93 | 7   | 69.69 (84.73)     | 97.8 (71.97)      | 90.49 (58.89)     | 50.45 (24.12)     | 0.992                               | 0.196     | 6.60E-05                          | 0.769 | 3.10E-05 | 2.37E-03 | 0.745    | 3.51E-04 |
| Asp/Citrulline              | 93 | 7   | 0.29 (0.17)       | 0.35 (0.21)       | 0.4 (0.19)        | 0.28 (0.14)       | 0.479                               | 0.672     | 7.80E-05                          | 0.863 | 4.67E-03 | 3.99E-03 | 0.915    | 6.26E-03 |

**Supplementary Table 4. Mean ratios/interaction levels between AD and iPD. Same assessment as in Supplementary Table 2.**

| Metabolite                              | N  | CN | Mean (SD) |     |                     |                     |                     | unadjusted for confounders p-values |           |           |           |           | Adjusted for confounders p-values |           |          |          |  |
|-----------------------------------------|----|----|-----------|-----|---------------------|---------------------|---------------------|-------------------------------------|-----------|-----------|-----------|-----------|-----------------------------------|-----------|----------|----------|--|
|                                         |    |    | naive-PD  | iPD | AD                  | naive-PD vs iP      | CN AD vs CN iPD     | AD vs iPD                           | AD vs iPD | AD vs iPD | AD vs iPD | AD vs iPD | AD vs iPD                         | AD vs iPD |          |          |  |
| Gln-Tyr                                 | 93 | 7  | 103       | 28  | 4001.77 (2008.08)   | 4756.41 (1511.22)   | 5695.77 (2774.62)   | 3026.21 (1297.06)                   | 0.429841  | 0.109172  | 1.00E-06  | 0.133031  | 0                                 | 2.10E-05  | 0.038469 | 6.00E-06 |  |
| Cad/N-Acetyl-phenylalanine              | 93 | 7  | 103       | 28  | 9.67 (6.2)          | 7.01 (5.54)         | 7.22 (5.23)         | 12.1 (5.69)                         | 0.953762  | 0.283706  | 0.004548  | 0.00478   | 0                                 | 0.078795  | 0.057181 | 0.000458 |  |
| Phe <sup>3</sup> -HK                    | 93 | 7  | 103       | 28  | 2.9 (1.67)          | 2.22 (0.96)         | 3.82 (2.19)         | 1.95 (0.8)                          | 0.040634  | 0.297522  | 0.003536  | 0.001294  | 0                                 | 0.031236  | 0.008569 | 0.001205 |  |
| Asn <sup>3</sup> -HK                    | 93 | 7  | 103       | 28  | 1.5 (0.87)          | 1.17 (0.58)         | 1.91 (1.06)         | 0.99 (0.4)                          | 0.05412   | 0.319379  | 0.006118  | 0.000479  | 0                                 | 0.040923  | 0.006613 | 0.000204 |  |
| Gly <sup>3</sup> -HK                    | 93 | 7  | 103       | 28  | 25848.96 (14397.63) | 29390.23 (12533.15) | 21150.56 (13713.42) | 31747.96 (12096.33)                 | 0.053147  | 0.344501  | 0.003957  | 0.00322   | 0                                 | 0.025656  | 0.008913 | 0.00334  |  |
| Tyr <sup>3</sup> -HK                    | 93 | 7  | 103       | 28  | 2.69 (1.54)         | 2.15 (0.92)         | 3.38 (1.92)         | 1.69 (0.79)                         | 0.063877  | 0.391153  | 0.017027  | 0.001162  | 0                                 | 0.129541  | 0.001766 | 0.001963 |  |
| Tyr <sup>3</sup> -HK                    | 93 | 7  | 103       | 28  | 3.12 (1.81)         | 2.48 (1.15)         | 4.71 (3.07)         | 2.03 (0.89)                         | 0.027519  | 0.403836  | 0.005405  | 0.000946  | 0                                 | 0.001027  | 0.004079 | 0.002028 |  |
| Val <sup>3</sup> -HK                    | 93 | 7  | 103       | 28  | 10.08 (6.25)        | 7.99 (3.4)          | 12.85 (7.47)        | 6.47 (3.14)                         | 0.065714  | 0.421249  | 0.008483  | 0.000597  | 0                                 | 0.070434  | 0.0041   | 0.001032 |  |
| Leu <sup>3</sup> -HK                    | 93 | 7  | 103       | 28  | 5.72 (3.64)         | 4.53 (1.8)          | 7.52 (4.55)         | 3.64 (1.79)                         | 0.052989  | 0.442073  | 0.004011  | 0.000537  | 0                                 | 0.055787  | 0.005586 | 0.000906 |  |
| β-ala <sup>3</sup> -HK                  | 93 | 7  | 103       | 28  | 0.17 (0.13)         | 0.13 (0.07)         | 0.23 (0.15)         | 0.11 (0.06)                         | 0.06062   | 0.067234  | 0.000287  | 0.000623  | 0                                 | 0.001676  | 0.037271 | 0.000164 |  |
| Orn <sup>3</sup> -HK                    | 93 | 7  | 103       | 28  | 2.28 (1.29)         | 1.92 (1.18)         | 3.46 (2.14)         | 1.58 (0.69)                         | 0.065596  | 0.480323  | 3.90E-05  | 0.004936  | 0                                 | 0.000631  | 0.017262 | 0.000429 |  |
| Cys <sup>3</sup> -HK                    | 93 | 7  | 103       | 28  | 6398.49 (382.97)    | 6700.56 (239.6)     | 487.63 (341.8)      | 8428.02 (283.71)                    | 0.027059  | 0.397943  | 0.000114  | 0.000137  | 0                                 | 0.003464  | 0.000729 | 0.003464 |  |
| Tyr <sup>n</sup> -Acetyl-phenylalanine  | 93 | 7  | 103       | 28  | 2.27 (1.24)         | 1.92 (0.43)         | 2.93 (1.29)         | 1.55 (0.61)                         | 0.005488  | 0.645799  | 6.90E-05  | 0.00193   | 0                                 | 0.001083  | 0.021083 | 1.20E-05 |  |
| Cys <sup>3</sup> -AA                    | 93 | 7  | 103       | 28  | 6186.13 (5265.12)   | 5311.31 (2034.6)    | 4643.32 (2416.73)   | 7930.6 (3203.45)                    | 0.320297  | 0.685993  | 0.004027  | 0.000782  | 0                                 | 0.044668  | 0.018668 | 0.000118 |  |
| Cys/n-Acetyl-phenylalanine              | 93 | 7  | 103       | 28  | 8623.12 (4711.73)   | 7829.53 (2482.68)   | 6474.26 (3256.57)   | 11065.7 (4615.72)                   | 0.107346  | 0.949113  | 0.000313  | 0.00107   | 0                                 | 0.046458  | 0.018842 | 0.000139 |  |
| Gln <sup>3</sup> -HK                    | 93 | 7  | 103       | 28  | 1.82 (1.94)         | 1.48 (0.74)         | 2.41 (1.41)         | 1.04 (0.7)                          | 0.112678  | 0.966084  | 8.60E-05  | 0.004892  | 0                                 | 0.001452  | 0.010409 | 4.30E-05 |  |
| Orn/Cad                                 | 93 | 7  | 103       | 28  | 423.33 (376.29)     | 588.37 (285.68)     | 549.44 (297.14)     | 319.84 (107.77)                     | 0.583538  | 0.051845  | 3.90E-05  | 0.12686   | 1.00E-06                          | 0.001633  | 0.297439 | 0.000341 |  |
| 3-HK <sup>n</sup> -Acetyl-phenylalanine | 93 | 7  | 103       | 28  | 0.001069 (0.001035) | 0.000583 (0.000245) | 0.001391 (0.000991) | 0.000548 (0.000365)                 | 0.006541  | 0.141354  | 0.004538  | 0.002334  | 1.00E-06                          | 0.035867  | 0.11132  | 0.006999 |  |
| Thr <sup>3</sup> -HK                    | 93 | 7  | 103       | 28  | 4.5 (2.7)           | 3.36 (1.62)         | 6.31 (3.95)         | 3.18 (1.67)                         | 0.023122  | 0.21421   | 0.000992  | 0.004898  | 1.00E-06                          | 0.008525  | 0.016323 | 0.001826 |  |
| Met <sup>3</sup> -HK                    | 93 | 7  | 103       | 28  | 1.08 (0.62)         | 0.82 (0.31)         | 1.38 (0.8)          | 0.72 (0.32)                         | 0.039126  | 0.272823  | 0.008666  | 0.001225  | 1.00E-06                          | 0.061353  | 0.007175 | 0.001166 |  |
| Arg <sup>3</sup> -HK                    | 93 | 7  | 103       | 28  | 2931.38 (1651.62)   | 3064.42 (992.07)    | 2288.53 (1570.57)   | 3913.32 (2138.55)                   | 0.010803  | 0.317445  | 0.000544  | 0.004038  | 1.00E-06                          | 0.01425   | 0.013294 | 0.002674 |  |
| 3-HK <sup>3</sup> -AA                   | 93 | 7  | 103       | 28  | 0.00143 (0.00119)   | 0.000956 (0.000668) | 0.00201 (0.00161)   | 0.000762 (0.000515)                 | 0.037884  | 0.336242  | 0.005973  | 0.001668  | 1.00E-06                          | 0.037652  | 0.015578 | 0.000491 |  |
| Cad <sup>3</sup> -HK                    | 93 | 7  | 103       | 28  | 7.26 (5.4)          | 5.08 (2.25)         | 5.48 (4.98)         | 10.3 (8.43)                         | 0.393239  | 0.339559  | 0.001312  | 0.005299  | 1.00E-06                          | 0.026388  | 0.019806 | 0.000806 |  |
| lle <sup>3</sup> -HK                    | 93 | 7  | 103       | 28  | 2.92 (1.91)         | 2.22 (0.85)         | 3.83 (2.31)         | 1.94 (0.99)                         | 0.042327  | 0.67257   | 0.003028  | 0.00237   | 1.00E-06                          | 0.029495  | 0.015047 | 0.001511 |  |
| 3-HK <sup>n</sup> Tryptamine            | 93 | 7  | 103       | 28  | 0.000801 (0.000651) | 0.000563 (0.000281) | 0.00103 (0.000743)  | 0.000423 (0.000244)                 | 0.055771  | 0.390078  | 0.19616   | 0.00359   | 1.00E-06                          | 0.083061  | 0.002841 | 0.000792 |  |
| Gln <sup>3</sup> -AA                    | 93 | 7  | 103       | 28  | 1.68 (1.19)         | 1.86 (1.12)         | 2.08 (1.6)          | 1.1 (0.66)                          | 0.437945  | 0.413988  | 0.00308   | 0.004406  | 1.00E-06                          | 0.003654  | 0.01639  | 4.80E-05 |  |
| Citrulline <sup>3</sup> -HK             | 93 | 7  | 103       | 28  | 1246.18 (727.42)    | 1348.03 (617.07)    | 997.43 (622.64)     | 1669.81 (820.34)                    | 0.074145  | 0.469849  | 0.003778  | 0.002422  | 1.00E-06                          | 0.084543  | 0.0113   | 0.004335 |  |
| Pu <sup>3</sup> -HK                     | 93 | 7  | 103       | 28  | 10.58 (7.67)        | 9.99 (5.73)         | 8.4 (10.06)         | 12.7 (7.6)                          | 0.033521  | 0.583456  | 0.001762  | 0.019651  | 1.00E-06                          | 0.0013834 | 0.01732  | 0.00281  |  |
| Aspartic acid <sup>3</sup> -HK          | 93 | 7  | 103       | 28  | 0.37 (0.37)         | 0.32 (0.21)         | 0.57 (0.37)         | 0.24 (0.12)                         | 0.154509  | 0.712281  | 3.00E-05  | 0.157868  | 1.00E-06                          | 0.000915  | 0.174031 | 0.00037  |  |
| Arg/n-Acetyl-phenylalanine              | 93 | 7  | 103       | 28  | 3926.17 (2159.37)   | 3715.33 (1335.45)   | 3003.72 (1547.55)   | 4906.1 (2164.19)                    | 0.122444  | 0.877465  | 0.001112  | 0.00758   | 1.00E-06                          | 0.037353  | 0.050129 | 0.000546 |  |
| Citrulline/n-Acetyl-phenylalanine       | 93 | 7  | 103       | 28  | 1671.7 (912.62)     | 1564.02 (553.4)     | 1328.21 (615.28)    | 2079.3 (826.09)                     | 0.225429  | 0.907522  | 0.01352   | 0.002205  | 1.00E-06                          | 0.280638  | 0.03978  | 0.002344 |  |
| Tyr <sup>3</sup> -AA                    | 93 | 7  | 103       | 28  | 3.18 (1.52)         | 3.05 (1.46)         | 4.28 (2.26)         | 2.23 (1.03)                         | 0.116261  | 0.931885  | 0.000274  | 0.003653  | 1.00E-06                          | 0.002551  | 0.027848 | 5.10E-05 |  |
| Orn <sup>3</sup> -AA                    | 93 | 7  | 103       | 28  | 2.27 (0.99)         | 2.18 (0.99)         | 2.61 (1.59)         | 1.73 (0.9)                          | 0.087234  | 0.96763   | 8.70E-05  | 0.10214   | 1.00E-06                          | 0.000894  | 0.061088 | 0.000133 |  |
| Gln/Cad                                 | 93 | 7  | 103       | 28  | 303.64 (252.81)     | 485.92 (228.02)     | 394.57 (220.27)     | 207.4 (131.79)                      | 0.274427  | 0.022835  | 0.000101  | 0.031859  | 2.00E-06                          | 0.004261  | 0.090504 | 6.20E-05 |  |
| Gln/tryptamine                          | 93 | 7  | 103       | 28  | 0.99 (0.73)         | 1.06 (0.27)         | 1.26 (0.81)         | 0.62 (0.36)                         | 0.871071  | 0.052914  | 0.004258  | 0.001814  | 2.00E-06                          | 0.018255  | 0.008659 | 6.40E-05 |  |
| Gln/β-ala                               | 93 | 7  | 103       | 28  | 1.67 (1.45)         | 2.33 (0.68)         | 292.53 (173.49)     | 150.33 (73.78)                      | 0.463051  | 0.277866  | 4.50E-05  | 0.062066  | 2.00E-06                          | 0.000167  | 0.234291 | 3.40E-05 |  |
| Orn <sup>n</sup> -Acetyl-phenylalanine  | 93 | 7  | 103       | 28  | 2.16 (0.91)         | 1.43 (0.64)         | 2.21 (1.03)         | 1.22 (0.48)                         | 0.031697  | 0.652049  | 8.90E-05  | 0.020873  | 2.00E-06                          | 0.001138  | 0.080293 | 0.000133 |  |
| Aspartic acid <sup>3</sup> -AA          | 93 | 7  | 103       | 28  | 0.35 (0.24)         | 0.38 (0.29)         | 0.52 (0.34)         | 0.26 (0.12)                         | 0.257562  | 0.941777  | 4.90E-05  | 0.19695   | 2.00E-06                          | 0.001286  | 0.35838  | 0.00111  |  |
| Pro <sup>3</sup> -HK                    | 93 | 7  | 103       | 28  | 8238.42 (5364.92)   | 11311.22 (4990.47)  | 7613.87 (5203.18)   | 10877.88 (4732.36)                  | 0.024345  | 0.076968  | 0.101548  | 0.305E-04 | 3.00E-06                          | 0.158969  | 0.001566 | 0.00847  |  |
| N-Acetyl-phenylalanine <sup>3</sup> -AA | 93 | 7  | 103       | 28  | 0.001 (0.000754)    | 0.000759 (0.00038)  | 0.00128 (0.00078)   | 0.000578 (0.000381)                 | 0.097368  | 0.951552  | 0.010025  | 0.02194   | 3.00E-06                          | 0.067929  | 0.019164 | 0.000294 |  |
| Leu <sup>n</sup> -Acetyl-phenylalanine  | 93 | 7  | 103       | 28  | 4.14 (2.35)         | 3.7 (1.3)           | 4.86 (3.21)         | 2.79 (1.21)                         | 0.183035  | 0.914658  | 0.01471   | 0.001912  | 3.00E-06                          | 0.176846  | 0.026441 | 0.000448 |  |
| L <sup>3</sup> -HK <sup>n</sup> -HK     | 93 | 7  | 103       | 28  | 104.78 (62.77)      | 98.49 (35.21)       | 76.58 (47.88)       | 115.67 (44.81)                      | 0.034166  | 0.977929  | 4.00E-06  | 0.134862  | 3.00E-06                          | 0.001779  | 0.156997 | 0.006533 |  |
| lle <sup>n</sup> -Acetyl-phenylalanine  | 93 | 7  | 103       | 28  | 8300.6 (4861.08)    | 9354.34 (3955.75)   | 6796.95 (4315.02)   | 9405.52 (3190.14)                   | 0.04445   | 0.334255  | 0.003307  | 0.019449  | 4.00E-06                          | 0.02383   | 0.046287 | 0.006848 |  |
| Gln <sup>n</sup> -Acetyl-phenylalanine  | 93 | 7  | 103       | 28  | 1.24 (0.97)         | 1.16 (0.44)         | 1.63 (0.92)         | 0.8 (0.48)                          | 0.196697  | 0.527486  | 0.000326  | 0.010359  | 4.00E-06                          | 0.004118  | 0.031017 | 4.60E-05 |  |
| Trp <sup>n</sup> -Acetyl-phenylalanine  | 93 | 7  | 103       | 28  | 1.97 (1.08)         | 1.67 (0.34)         | 2.19 (0.97)         | 1.29 (0.5)                          | 0.084184  | 0.669714  | 0.068393  | 0.000579  | 4.00E-06                          | 0.0417407 | 0.009036 | 0.008314 |  |
| Sarco <sup>3</sup> -HK                  | 93 | 7  | 103       | 28  | 0.06 (0.04)         | 0.06 (0.04)         | 0.08 (0.06)         | 0.04 (0.02)                         | 0.195675  | 0.713436  | 0.014357  | 0.003344  | 5.00E-06                          | 0.138804  | 0.018732 | 0.008118 |  |
| Cad/Tyr                                 | 93 | 7  | 103       | 28  | 0.00238 (0.00107)   | 0.00149 (0.000808)  | 0.00175 (0.000936)  | 0.0029 (0.00151)                    | 0.492203  | 0.051878  | 0.000104  | 0.048372  | 6.00E-06                          | 0.004528  | 0.133011 | 0.000215 |  |
| Gln/Orn                                 | 93 | 7  | 103       | 28  | 3036.22 (1674.92)   | 3564.5 (1613.55)    | 4207.2 (2022.61)    | 2423.13 (1117.07)                   | 0.045942  | 0.263255  | 0.004096  | 0.14253   | 6.00E-06                          | 0.490E-05 | 0.194467 | 2.70E-05 |  |
| His <sup>3</sup> -HK                    | 93 | 7  | 103       | 28  | 2.54 (1.42)         | 2.01 (0.72)         | 3.21 (1.88)         | 1.73 (0.8)                          | 0.050759  | 0.40129   | 0.012175  | 0.005863  | 6.00E-06                          | 0.074948  | 0.027765 | 0.004739 |  |
| Gln <sup>3</sup> -Leu                   | 93 | 7  | 103       | 28  | 7404.65 (4171.7)    | 9156.52 (3621.55)   | 9235.58 (4943.86)   | 5500.41 (2688.68)                   | 0.077107  | 0.314073  | 0.000675  | 0.015704  | 7.00E-06                          | 0.011445  | 0.06131  | 0.001102 |  |
| Gly <sup>3</sup> -HK                    | 93 | 7  | 103       | 28  | 9881.47 (5522.65)   | 11454.21 (5059.55)  | 8971.94 (5991.74)   | 13150.68 (5491.54)                  | 0.154258  | 0.377303  | 0.110062  | 0.000654  | 7.00E-06                          | 0.396266  | 0.00413  | 0.018546 |  |
| Thr <sup>3</sup> -AA                    | 93 | 7  | 103       | 28  | 4.55 (2.02)         | 3.93 (0.81)         | 5.7 (2.71)          | 3.4 (1.47)                          | 0.001224  | 0.002681  | 0.009227  |           |                                   |           |          |          |  |
